# Supplementary material for: Frequency of Care and Mortality Following an Incident Diagnosis of Peripheral Artery Disease in the Inpatient or Outpatient Setting: The ARIC (Atherosclerosis Risk in Communities) Study
Source: PubMed Central journal article supplement — J Am Heart Assoc. 2018 Apr 13;7(8):e007332. doi: 10.1161/JAHA.117.007332 (PMC6015432; doi:10.1161/jaha.117.007332), 2018-04-13
Supplement: JAH3-7-e007332-s001.pdf [file JAH3-7-e007332-s001.pdf]

## **SUPPLEMENTAL MATERIAL**

**Table S1.** International Classification of Diseases, Ninth Revision (ICD-9-CM), Current Procedural Terminology, 4<sup>th</sup> edition (CPT-4), Healthcare Common Procedure Coding System (HCPCS), and Federally Qualified Healthcare Revenue Center (FQHC) codes used to identify peripheral artery disease and provider specialty visits in claims.

| Code Type                | Codes                                                                                                                                                                                                                                                                                                                                                                                                                                                                                                                                                                                                                                                                                                                                                                                                                                                                                                                                                                                                                             |
|--------------------------|-----------------------------------------------------------------------------------------------------------------------------------------------------------------------------------------------------------------------------------------------------------------------------------------------------------------------------------------------------------------------------------------------------------------------------------------------------------------------------------------------------------------------------------------------------------------------------------------------------------------------------------------------------------------------------------------------------------------------------------------------------------------------------------------------------------------------------------------------------------------------------------------------------------------------------------------------------------------------------------------------------------------------------------|
| ICD-9-CM                 | <p>249.70, 249.71, 250.70, 250.71, 250.72, 250.73, 440.20, 440.21, 440.22, 440.23, 440.24, 440.29, 440.30, 440.31, 440.32, 440.4, 440.8, 440.9, 443.1, 443.22, 443.81, 443.89, 443.9, 444.22, 444.81, 445.02</p> <p>* 38.08, 38.16, 38.18, 38.38, 38.48, 39.25, 39.29, 39.49, 39.50, 39.56, 39.57, 39.58, 39.90, 84.10, 84.12, 84.13, 84.14, 84.15, 84.16, 84.17, 84.18, 84.3, 84.91</p>                                                                                                                                                                                                                                                                                                                                                                                                                                                                                                                                                                                                                                          |
| HCPCS/CPT-4              | <p>27295, 27590, 27591, 27592, 27594, 27596, 27598, 27599, 27880, 27881, 27882, 27888, 27889, 28800, 28805, 28810, 28820, 28825, 35221, 35226, 35256, 35286, 35302, 35303, 35304, 35305, 35306, 35331, 35351, 35355, 35361, 35363, 35371, 35372, 35381, 35452, 35454, 35456, 35459, 35470, 35472, 35473, 35474, 35480, 35481, 35482, 35483, 35485, 35490, 35491, 35492, 35493, 35495, 35500, 35521, 35533, 35537, 35538, 35539, 35540, 35541, 35546, 35548, 35549, 35551, 35556, 35558, 35563, 35565, 35566, 35583, 35585, 35587, 35621, 35623, 35646, 35647, 35651, 35654, 35656, 35661, 35663, 35665, 35666, 35671, 35681, 35682, 35700, 35875, 35876, 35879, 35881, 35883, 35884, 35903</p> <p>* 35683, 35686, 35571, 72191, 72198, 73706, 73725, 74175, 74185, 75630, 75631, 75635, 75710, 75711, 75712, 75716, 75717, 75718, 93922, 93924, 93925, 93926, 93978, 99201, 99202, 99203, 99204, 99205, 99211, 99212, 99213, 99214, 99215, 99216, 99241, 99242, 99243, 99244, 99245, 99385, 99386, 99387, 99395, 99396, 99397</p> |
| Revenue Center Codes     | <p>*0320,0321,0322,0323,0324,0329,0360,0361,0370,0371,0372,0379,0402,0490,0499,0510,0517,0519,0520,0521,0610,0616,0710,0760,0761,0762,0769,0921</p>                                                                                                                                                                                                                                                                                                                                                                                                                                                                                                                                                                                                                                                                                                                                                                                                                                                                               |
| Provider Specialty Codes | <p>Primary Care Provider 01, 08, 11, 50, 70</p>                                                                                                                                                                                                                                                                                                                                                                                                                                                                                                                                                                                                                                                                                                                                                                                                                                                                                                                                                                                   |

---

Cardiology 06

---

\* Must be accompanied with a PAD-related ICD-9-CM code

| <b>ICD-9-CM Diagnosis Codes for PAD: Definitions</b>                                                                              |                  |
|-----------------------------------------------------------------------------------------------------------------------------------|------------------|
| <b>Description</b>                                                                                                                | <b>Code</b>      |
| Atherosclerosis:                                                                                                                  |                  |
| of native arteries of the extremities                                                                                             | 440.2x           |
| of bypass graft of the extremities                                                                                                | 440.3x           |
| of other specified arteries                                                                                                       | 440.8x           |
| Generalized and unspecified atherosclerosis:<br>arteriosclerotic vascular disease NOS<br>Peripheral vascular disease, unspecified | 440.9x<br>443.9x |
| Chronic total occlusion of artery of the extremities                                                                              | 440.4            |
| Arterial embolism and thrombosis of lower extremity                                                                               | 444.22           |
| Embolism and thrombosis of iliac artery                                                                                           | 444.81           |
| Atheroembolism of lower extremity                                                                                                 | 445.02           |
| Diabetes with peripheral circulatory disorders, Type II or unspecified type, not stated as uncontrolled                           | 250.70           |
| Diabetes with peripheral circulatory disorders, Type I (Juvenile type), not stated as uncontrolled                                |                  |
| Diabetes with peripheral circulatory disorders, Type II or unspecified type, uncontrolled                                         | 250.71           |
| Diabetes with peripheral circulatory disorders, Type I (Juvenile type), uncontrolled                                              | 250.72           |
|                                                                                                                                   | 250.73           |

| <b>ICD-9-CM Surgical/Intervention Procedure Codes for PAD: Definitions</b> |             |
|----------------------------------------------------------------------------|-------------|
| <b>Description</b>                                                         | <b>Code</b> |
| Amputation of lower limb                                                   | 84.1x       |
| Amputation not otherwise specified                                         |             |
| Aorta-iliac-femoral bypass                                                 | 84.91       |
| Other (peripheral) vascular shunt or bypass                                | 39.25       |
| Incision of lower limb arteries                                            |             |

|                                                             |       |
|-------------------------------------------------------------|-------|
| Endarterectomy, abdominal arteries                          | 39.29 |
| Endarterectomy, lower limb arteries                         |       |
| Resection of vessel with anastomosis, lower limb arteries   | 38.08 |
| Resection of vessel with replacement, lower limb arteries   |       |
| Other excision of vessels, lower limb arteries              | 38.16 |
| Other revision of vascular procedure                        | 38.18 |
| Angioplasty or atherectomy of other non-coronary vessel(s)  | 38.38 |
| Insertion of non-drug-eluting peripheral vessel stent(s)    | 38.48 |
| Repair of blood vessel with tissue patch graft              | 38.68 |
| Repair of blood vessel with synthetic patch graft           | 39.49 |
| Repair of blood vessel with unspecified type of patch graft | 39.50 |
|                                                             | 39.90 |
|                                                             | 39.56 |
|                                                             | 39.57 |
|                                                             | 39.58 |

| <b>CPT-4 codes for PAD-related surgical or intervention procedures: Definitions</b>                                                                                                                                                                                                                                      |             |
|--------------------------------------------------------------------------------------------------------------------------------------------------------------------------------------------------------------------------------------------------------------------------------------------------------------------------|-------------|
| <b>Description</b>                                                                                                                                                                                                                                                                                                       | <b>Code</b> |
| Repair blood vessel lower extremity;<br>direct                                                                                                                                                                                                                                                                           |             |
| with vein graft                                                                                                                                                                                                                                                                                                          | 35226       |
| with graft other than vein                                                                                                                                                                                                                                                                                               | 35256       |
|                                                                                                                                                                                                                                                                                                                          | 35286       |
| Thromboendarterectomy, including patch graft, if performed; superficial femoral artery                                                                                                                                                                                                                                   |             |
| popliteal artery                                                                                                                                                                                                                                                                                                         | 35302       |
| tibioperoneal trunk artery                                                                                                                                                                                                                                                                                               |             |
| tibial or peroneal artery, initial vessel                                                                                                                                                                                                                                                                                | 35303       |
| each additional tibial or peroneal artery                                                                                                                                                                                                                                                                                | 35304       |
|                                                                                                                                                                                                                                                                                                                          | 35305       |
|                                                                                                                                                                                                                                                                                                                          | 35306       |
| Thromboendarterectomy, with or without patch graft;<br>abdominal aorta (35331);<br>iliac (35351);<br>iliofemoral (35355);<br>combined aortoiliac (35361);<br>combined aortoiliofemoral (35363);<br>common femoral (35371);<br>deep (profunda) femoral (35372);<br>femoral and/or popliteal, and/or tibioperoneal (35381) |             |
|                                                                                                                                                                                                                                                                                                                          | 35331       |
|                                                                                                                                                                                                                                                                                                                          | 35351       |
|                                                                                                                                                                                                                                                                                                                          | 35355       |

|                                                                                                                                                                                                                                                                                                                                                                                                                                                                                                                  |       |
|------------------------------------------------------------------------------------------------------------------------------------------------------------------------------------------------------------------------------------------------------------------------------------------------------------------------------------------------------------------------------------------------------------------------------------------------------------------------------------------------------------------|-------|
|                                                                                                                                                                                                                                                                                                                                                                                                                                                                                                                  | 35361 |
|                                                                                                                                                                                                                                                                                                                                                                                                                                                                                                                  | 35363 |
|                                                                                                                                                                                                                                                                                                                                                                                                                                                                                                                  | 35371 |
|                                                                                                                                                                                                                                                                                                                                                                                                                                                                                                                  | 35372 |
|                                                                                                                                                                                                                                                                                                                                                                                                                                                                                                                  | 35381 |
| In-situ vein bypass;<br>aortofemoral-popliteal (only femoral-popliteal portion in-situ)<br>femoral-popliteal<br>femoral-anterior tibial, posterior tibial, or peroneal artery<br>popliteal-tibial, peroneal                                                                                                                                                                                                                                                                                                      | 35582 |
|                                                                                                                                                                                                                                                                                                                                                                                                                                                                                                                  | 35583 |
|                                                                                                                                                                                                                                                                                                                                                                                                                                                                                                                  | 35585 |
|                                                                                                                                                                                                                                                                                                                                                                                                                                                                                                                  | 35587 |
| Bypass graft, with vein;<br>axillary-femoral<br>axillary-femoral-femoral<br>aortoiliac<br>aortobi-iliac<br>aortofemoral<br>aortobifemoral<br>aortoiliac or bi-iliac<br>aortofemoral or bifemoral<br>aortoiliofemoral, unilateral<br>aortoiliofemoral, bilateral<br>aortofemoral-popliteal<br>femoral-popliteal<br>femoral-femoral<br>ilioiliac<br>iliofemoral<br>femoral-anterior tibial, posterior tibial, peroneal artery or other distal vessels<br>popliteal-tibial,-peroneal artery or other distal vessels | 35521 |
|                                                                                                                                                                                                                                                                                                                                                                                                                                                                                                                  | 35533 |
|                                                                                                                                                                                                                                                                                                                                                                                                                                                                                                                  | 35537 |
|                                                                                                                                                                                                                                                                                                                                                                                                                                                                                                                  | 35538 |
|                                                                                                                                                                                                                                                                                                                                                                                                                                                                                                                  | 35539 |
|                                                                                                                                                                                                                                                                                                                                                                                                                                                                                                                  | 35540 |
|                                                                                                                                                                                                                                                                                                                                                                                                                                                                                                                  | 35541 |
|                                                                                                                                                                                                                                                                                                                                                                                                                                                                                                                  | 35546 |
|                                                                                                                                                                                                                                                                                                                                                                                                                                                                                                                  | 35548 |
|                                                                                                                                                                                                                                                                                                                                                                                                                                                                                                                  | 35549 |
|                                                                                                                                                                                                                                                                                                                                                                                                                                                                                                                  | 35551 |
|                                                                                                                                                                                                                                                                                                                                                                                                                                                                                                                  | 35556 |
|                                                                                                                                                                                                                                                                                                                                                                                                                                                                                                                  | 35558 |
|                                                                                                                                                                                                                                                                                                                                                                                                                                                                                                                  | 35563 |

|                                                                                                                                                         |                                  |
|---------------------------------------------------------------------------------------------------------------------------------------------------------|----------------------------------|
|                                                                                                                                                         | 35565<br>35566<br>35571          |
| Percutaneous:<br>aortic<br>iliac<br>femoral-popliteal<br>tibioperoneal trunk and branches                                                               | 35491<br>35492<br>35493<br>35495 |
| Transluminal peripheral atherectomy, Open:<br>aortic<br>iliac<br>femoral-popliteal<br>tibioperoneal trunk and branches                                  | 35481<br>35482<br>35483<br>35485 |
| Transluminal balloon angioplasty, percutaneous;<br>tibioperoneal trunk and branches, each vessel<br>aortic<br>iliac<br>femoral-popliteal                | 35470<br>35472<br>35473<br>35474 |
| Transluminal balloon angioplasty, open;<br>aortic (35452);<br>iliac (35454);<br>femoral-popliteal (35456);<br>tibioperoneal trunk and branches (35459); | 35452<br>35454<br>35456<br>35459 |
| Bypass graft, with other than vein;<br>axillary-femoral<br>axillary-popliteal or –tibial<br>aortoiliac                                                  | 35621                            |

|                                                                                                                                                                                                                                                          |       |
|----------------------------------------------------------------------------------------------------------------------------------------------------------------------------------------------------------------------------------------------------------|-------|
| aortobi-iliac                                                                                                                                                                                                                                            | 35623 |
| aortoiliac or bi-iliac                                                                                                                                                                                                                                   |       |
| aortofemoral or bifemoral                                                                                                                                                                                                                                | 35637 |
| aortofemoral                                                                                                                                                                                                                                             | 35638 |
| aortofemoral-popliteal                                                                                                                                                                                                                                   |       |
| axillary-femoral-femoral                                                                                                                                                                                                                                 | 35641 |
| femoral-popliteal                                                                                                                                                                                                                                        |       |
| femoral-femoral                                                                                                                                                                                                                                          | 35646 |
| ilioiliac                                                                                                                                                                                                                                                |       |
| iliofemoral                                                                                                                                                                                                                                              | 35647 |
| femoral-anterior tibial, posterior tibial, or peroneal artery                                                                                                                                                                                            | 35651 |
| popliteal-tibial or -peroneal artery                                                                                                                                                                                                                     |       |
|                                                                                                                                                                                                                                                          | 35654 |
|                                                                                                                                                                                                                                                          | 35656 |
|                                                                                                                                                                                                                                                          | 35661 |
|                                                                                                                                                                                                                                                          | 35663 |
|                                                                                                                                                                                                                                                          | 35665 |
|                                                                                                                                                                                                                                                          | 35666 |
|                                                                                                                                                                                                                                                          | 35671 |
| Exploration, reoperation, femoral-popliteal or femoral (popliteal) -anterior tibial, posterior tibial, peroneal artery or other distal vessels, more than one month after original operation (List separately in addition to code for primary procedure) | 35700 |
| Exploration (not followed by surgical repair), with or without lysis of artery;                                                                                                                                                                          |       |
| femoral artery                                                                                                                                                                                                                                           | 35721 |
| popliteal artery                                                                                                                                                                                                                                         | 35741 |
| Thrombectomy of arterial or venous graft, with revision of arterial or venous graft                                                                                                                                                                      | 35876 |
| Revision, lower extremity arterial bypass, without thrombectomy, open;                                                                                                                                                                                   |       |
| with vein patch angioplasty                                                                                                                                                                                                                              | 35879 |
| with segmental vein interposition                                                                                                                                                                                                                        | 35881 |
| Revision, femoral anastomosis of synthetic arterial bypass graft in groin, open;                                                                                                                                                                         |       |



|                                                                                                                                                                                                                                                                                                                                                                                                                                       |       |
|---------------------------------------------------------------------------------------------------------------------------------------------------------------------------------------------------------------------------------------------------------------------------------------------------------------------------------------------------------------------------------------------------------------------------------------|-------|
| with non autogenous patch graft (e.g., Dacron, ePTFE, bovine pericardium)                                                                                                                                                                                                                                                                                                                                                             | 35883 |
| with autogenous vein patch graft                                                                                                                                                                                                                                                                                                                                                                                                      | 35884 |
| Primary percutaneous transluminal mechanical thrombectomy, noncoronary, arterial or arterial bypass graft, including fluoroscopic guidance and intra procedural pharmacological thrombolytic injection(s);<br><br>initial vessel                                                                                                                                                                                                      | 37184 |
| second and all subsequent vessel(s) within the same vascular family (List separately in addition to code for primary mechanical thrombectomy procedure)                                                                                                                                                                                                                                                                               | 37185 |
| Secondary percutaneous transluminal thrombectomy (e.g., non primary mechanical, snare basket, suction technique), noncoronary, arterial or arterial bypass graft, including fluoroscopic guidance and intra procedural pharmacological thrombolytic injections, provided in conjunction with another percutaneous intervention other than primary mechanical thrombectomy (List separately in addition to code for primary procedure) | 37186 |
| Transcatheter placement of an intravascular stent(s), (except coronary, carotid, and vertebral vessel), percutaneous;<br><br>initial vessel (37205)                                                                                                                                                                                                                                                                                   | 37205 |
| each additional vessel (List separately in addition to code for primary procedure)                                                                                                                                                                                                                                                                                                                                                    | 37206 |
| Transcatheter placement of an intravascular stent(s), (except coronary, carotid, and vertebral vessel), open;<br><br>each additional vessel (List separately in addition to code for primary procedure)                                                                                                                                                                                                                               | 37208 |
| Disarticulation;                                                                                                                                                                                                                                                                                                                                                                                                                      |       |
| of hip                                                                                                                                                                                                                                                                                                                                                                                                                                | 27295 |
| at knee                                                                                                                                                                                                                                                                                                                                                                                                                               | 27598 |
| of ankle                                                                                                                                                                                                                                                                                                                                                                                                                              | 27889 |
| Amputation, thigh, through femur, any level                                                                                                                                                                                                                                                                                                                                                                                           | 27590 |

|                                                                                                                                  |       |
|----------------------------------------------------------------------------------------------------------------------------------|-------|
| immediate fitting technique including first cast                                                                                 | 27591 |
| open, circular (guillotine)                                                                                                      | 27592 |
| leg, through tibia and fibula                                                                                                    | 27880 |
| with immediate fitting technique including application of first cast                                                             | 27881 |
| open, circular (guillotine)                                                                                                      | 27882 |
| ankle, through malleoli of tibia and fibula (e.g., Syme, Pirogoff type procedures), with plastic closure and resection of nerves | 27888 |
| foot; midtarsal (e.g., Chopart type procedure)                                                                                   | 28800 |
| transmetatarsal                                                                                                                  | 28805 |

| <b>CPT-4 codes for PAD-related diagnostic procedures: Definitions</b>                                                             |                |
|-----------------------------------------------------------------------------------------------------------------------------------|----------------|
| <b>Description</b>                                                                                                                | <b>Code</b>    |
| Aortography:<br>abdominal plus bilateral iliofemoral lower extremity, catheter, by serialography, radiological complete procedure | 75630<br>75631 |
| Angiography, extremity, unilateral, radiological supervision and interpretation complete procedure                                | 75710<br>75711 |
| bilateral; by serialography, complete procedure                                                                                   | 75712          |
| radiological                                                                                                                      | 75716          |
| without serialography; complete procedure                                                                                         | 75717          |
| by serialography, complete procedure                                                                                              | 75718          |
| Arterial duplex of the lower extremities,<br>unilateral                                                                           | 93925          |
| bilateral                                                                                                                         | 93926          |

|                                                                                       |       |
|---------------------------------------------------------------------------------------|-------|
| aorta                                                                                 | 93978 |
| CT Angiogram Abdomen with & w/o contrast                                              | 74175 |
| Pelvis                                                                                | 72191 |
| Lower Extremity                                                                       | 73706 |
| abdominal aorta and bilateral iliofemoral lower extremity runoff                      | 75635 |
| MRA abdomen images from the diaphragm to the umbilicus or iliac crest                 | 74185 |
| Pelvis                                                                                | 72198 |
| Lower extremity w/ or w/o contrast                                                    | 73725 |
| Non-invasive physiologic studies of lower extremity arteries, single level, bilateral | 93922 |
| at rest and following treadmill stress testing, complete bilateral study              | 93924 |

| <b>Other PAD-related codes: Definitions</b>                                                             |             |
|---------------------------------------------------------------------------------------------------------|-------------|
| <b>Description</b>                                                                                      | <b>Code</b> |
| Chronic total occlusion of artery of the extremities                                                    | 440.4       |
| Arterial embolism and thrombosis of lower extremity                                                     | 444.22      |
| Embolism and thrombosis of iliac artery                                                                 | 444.81      |
| Atheroembolism of lower extremity                                                                       | 445.02      |
| Diabetes with peripheral circulatory disorders, Type II or unspecified type, not stated as uncontrolled | 250.70      |
| Diabetes with peripheral circulatory disorders, Type I (Juvenile type), not stated as uncontrolled      |             |
| Diabetes with peripheral circulatory disorders, Type II or unspecified type, uncontrolled               | 250.71      |
| Diabetes with peripheral circulatory disorders, Type I (Juvenile type), uncontrolled                    | 250.72      |
|                                                                                                         | 250.73      |
| Endarterectomy, abdominal arteries                                                                      | 38.16       |

**Table S2. Characteristics of fee-for-service participants without an incident PAD diagnosis (N=10,566) and those with an incident PAD diagnosis in the outpatient (N=873) or inpatient setting (N=213). The Atherosclerosis Risk in Communities Study, 2002-2010.**

|                                                 | PAD status           |                          |
|-------------------------------------------------|----------------------|--------------------------|
|                                                 | No PAD<br>(N=10,566) | Positive PAD<br>(N=1086) |
| <b>Mean Age at Diagnosis, SD</b>                | NA                   | 74.8 (4.8)               |
| <b>Sex, % Female</b>                            | 57.4 (56.4, 58.3)    | 55.5 (52.5, 58.5)        |
| <b>Race, % Black</b>                            | 27.9 (27.1, 28.8)    | 27.1 (24.4, 29.7)        |
| <b>Median household income, %</b>               |                      |                          |
| <b>Low (&lt;\$35,000)</b>                       | 34.5 (33.6, 35.4)    | 54.1 (50.5, 57.0)        |
| <b>Mid (\$35,000-\$49,999)</b>                  | 19.4 (18.7, 20.2)    | 18.9 (16.3, 21.6)        |
| <b>High (≥ \$50,000)</b>                        | 46.1 (45.2, 47.1)    | 27.1 (24.4, 29.7)        |
| <b>Education, &lt; High School, %</b>           | 22.2 (21.4, 23.0)    | 28.2 (25.4, 31.1)        |
| <b>Diabetes*, %</b>                             | 20.0 (19.2, 20.7)    | 43.0 (39.6, 46.4)        |
| <b>Smoking History<sup>†</sup>, %</b>           | 66.4 (65.5, 67.3)    | 68.6 (65.8, 71.4)        |
| <b>Hyperlipidemia<sup>‡</sup>, %</b>            | 70.9 (70.1, 71.8)    | 75.3 (72.8, 77.9)        |
| <b>Hypertension<sup>§</sup>, %</b>              | 52.4 (51.4, 53.4)    | 84.1 (81.8, 86.3)        |
| <b>Obesity<sup>#</sup>, %</b>                   | 39.8 (38.8, 40.7)    | 50.1 (47.1, 53.1)        |
| <b>History of CHD<sup>**</sup>, %</b>           | 11.6 (11.0, 12.2)    | 17.2 (14.7, 19.5)        |
| <b>History of Stroke<sup>††</sup>, %</b>        | 8.3 (7.8, 8.9)       | 11.0 (9.0, 12.9)         |
| <b>History of Heart Failure<sup>‡‡</sup>, %</b> | 16.2 (15.5, 16.9)    | 21.0 (18.5, 23.6)        |
| <b>End Stage Renal Disease<sup>§§</sup></b>     | 0.7 (0.5, 0.9)       | 0.4 (0.2, 0.7)           |
| <b>Self-Rated Health, Poor<sup>###</sup></b>    | 27.0 (26.1, 27.8)    | 28.7 (25.7, 31.6)        |

\*Diabetes defined as self-reported history of physician-diagnosed diabetes at any of the four clinic visits or diabetes medication during two weeks prior to visit or fasting glucose  $\geq 126$  mg/dl fasting or a nonfasting blood glucose  $\geq 200$  mg/dl; <sup>†</sup> Smoking History is defined as any history or no history; <sup>‡</sup> Hyperlipidemia defined as total cholesterol  $\geq 240$  mg/dl ; <sup>§</sup> Hypertension defined as

systolic blood pressure  $\geq$  140 mm Hg or diastolic blood pressure  $\geq$  90 mm Hg or antihypertensive medication usage during two weeks prior to any of the four clinic visits; # Obesity defined as body mass index  $\geq$  30 kg/m<sup>2</sup> ; \*\* History of CHD (coronary heart disease) defined as history of myocardial infarction, coronary revascularization during any time during follow-up but prior to incident PAD diagnosis date; \*\*History of stroke defined as prevalent or incident stroke prior to incident PAD diagnosis date; \*\* History of Heart Failure defined as prevalent or incident heart failure prior to incident PAD diagnosis date; §§ End-stage renal disease defined as eGFR <15.0 mL/min/m<sup>2</sup> using the CKD-EPI equation; ## Self-rated health defined as poor, fair, good, excellent

**Table S3. Characteristics of fee-for-service participants with an incident PAD diagnosis in the outpatient (N=873) by sex and race. The Atherosclerosis Risk in Communities Study, 2002-2010.**

|                                       | <b>Incident Outpatient PAD</b> |              |              |              |
|---------------------------------------|--------------------------------|--------------|--------------|--------------|
|                                       | <b>Females</b>                 | <b>Males</b> | <b>Black</b> | <b>White</b> |
| <b>Median household income, %</b>     |                                |              |              |              |
| <b>Low (&lt;\$35,000)</b>             | 62.2                           | 42.2         | 81.4         | 43.4         |
| <b>Mid (\$35,000-\$49,999)</b>        | 18.3                           | 20.4         | 8.9          | 23.1         |
| <b>High (≥ \$50,000)</b>              | 19.5                           | 37.3         | 9.7          | 33.5         |
| <b>Education, &lt; High School, %</b> | 30.6                           | 24.9         | 45.8         | 21.6         |
| <b>Mean age at diagnosis, SD</b>      | 74.9 (4.9)                     | 75.1 (4.9)   | 73.5 (4.8)   | 75.5 (4.8)   |

**Table S4. Characteristics of fee-for-service participants with an incident PAD diagnosis in the inpatient (N=213) by sex and race. The Atherosclerosis Risk in Communities Study, 2002-2010.**

|                                       | <b>Incident Inpatient PAD</b> |              |              |              |
|---------------------------------------|-------------------------------|--------------|--------------|--------------|
|                                       | <b>Females</b>                | <b>Males</b> | <b>Black</b> | <b>White</b> |
| <b>Median household income, %</b>     |                               |              |              |              |
| <b>Low (&lt;\$35,000)</b>             | 69.7                          | 42.5         | 80.4         | 45.8         |
| <b>Mid (\$35,000-\$49,999)</b>        | 12.1                          | 22.1         | 10.7         | 20.0         |
| <b>High (≥ \$50,000)</b>              | 18.2                          | 35.4         | 8.9          | 34.2         |
| <b>Education, &lt; High School, %</b> | 28.3                          | 28.3         | 43.6         | 23.1         |
| <b>Mean age at diagnosis, SD</b>      | 74.4 (4.7)                    | 74.4 (4.5)   | 73.9 (4.6)   | 74.6 (4.6)   |

**Table S5. International Classification of Diseases, Ninth Revision (ICD-9-CM to identify concomitant diseases.**

| <b>Disease</b>         | <b>Codes</b>                                                                                                                                                                                                                                                                                                                                                                                                                                                                                                                                                                                                                                                                                                   |
|------------------------|----------------------------------------------------------------------------------------------------------------------------------------------------------------------------------------------------------------------------------------------------------------------------------------------------------------------------------------------------------------------------------------------------------------------------------------------------------------------------------------------------------------------------------------------------------------------------------------------------------------------------------------------------------------------------------------------------------------|
| Ischemic heart disease | 410.00, 410.01, 410.02, 410.10, 410.11, 410.12, 410.20, 410.21, 410.22, 410.30, 410.31, 410.32, 410.40, 410.41, 410.42, 410.50, 410.51, 410.52, 410.60, 410.61, 410.62, 410.70, 410.71, 410.72, 410.80, 410.81, 410.82, 410.90, 410.91, 410.92, 411.0, 411.1, 411.81, 411.89, 412.0, 413.0, 413.1, 413.9, 414.00, 414.01, 414.02, 414.03, 414.04, 414.05, 414.06, 414.07, 414.12, 414.2, 414.3, 414.4, 414.8, 414.9                                                                                                                                                                                                                                                                                            |
| Myocardial infarction  | 410, 410.0, 410.00, 410.01, 410.11, 410.21, 410.31, 410.31, 410.41, 410.51, 410.61, 410.71, 410.81, 410.91                                                                                                                                                                                                                                                                                                                                                                                                                                                                                                                                                                                                     |
| Atrial fibrillation    | 427.31, 427.32                                                                                                                                                                                                                                                                                                                                                                                                                                                                                                                                                                                                                                                                                                 |
| Heart failure          | 398.91, 402.01, 402.11, 402.91, 404.01, 404.11, 404.91, 404.03, 404.13, 404.93, 428, 428.0, 428.1, 428.20, 428.21, 428.22, 428.23, 428.30, 428.31, 428.32, 428.33, 428.40, 428.41, 428.42, 428.43, 428.9                                                                                                                                                                                                                                                                                                                                                                                                                                                                                                       |
| Stroke                 | 430, 431, 433.01, 433.11, 433.21, 433.31, 433.81, 433.91, 434.00, 434.01, 434.10, 434.11, 434.90, 434.91, 435.0, 435.1, 435.3, 435.8, 435.9, 436, 997.02                                                                                                                                                                                                                                                                                                                                                                                                                                                                                                                                                       |
| Chronic kidney disease | 016.00, 016.01, 016.03, 016.04, 016.05, 016.06, 095.4, 189.0, 189.9, 223.0, 236.91, 249.40, 249.41, 250.40, 250.41, 250.42, 250.43, 271.4, 274.10, 283.11, 403.01, 403.11, 403.91, 404.02, 404.03, 404.12, 404.13, 404.92, 404.93, 440.1, 442.1, 572.4, 580.0, 580.4, 580.81, 580.89, 580.9, 581.0, 581.1, 581.2, 581.3, 581.81, 581.89, 581.9, 582.0, 582.1, 582.2, 582.4, 582.81, 582.89, 582.9, 583.0, 583.1, 583.2, 583.4, 583.6, 583.7, 583.81, 583.89, 583.9, 584.5, 584.6, 584.7, 584.8, 584.9, 585, 585.1, 585.2, 585.3, 585.4, 585.5, 585.6, 585.9, 586, 587, 588.0, 588.1, 588.81, 588.89, 588.9, 591, 753.12, 753.14, 753.15, 753.16, 753.17, 753.19, 753.20, 753.21, 753.22, 753.23, 753.29, 794.4 |
| Diabetes mellitus      | 249.00, 249.01, 249.10, 249.11, 249.20, 249.21, 249.30, 249.31, 249.40, 249.41, 249.50, 249.51, 249.60, 249.61, 249.70, 249.71, 249.80, 249.81, 249.90, 249.91, 250.00, 250.01, 250.02, 250.03, 250.10, 250.11, 250.12, 250.13, 250.20, 250.21, 250.22, 250.23, 250.30, 250.31, 250.32, 250.33, 250.40, 250.41, 250.42, 250.43, 250.50, 250.51, 250.52, 250.53, 250.60, 250.61, 250.62, 250.63, 250.70, 250.71, 250.72, 250.73, 250.80, 250.81, 250.82, 250.83, 250.90, 250.91, 250.92, 250.93, 357.2, 362.01, 362.02, 362.03, 362.04, 362.05, 362.06, 366.41                                                                                                                                                  |
